# Supplementary material for: Exploring Knowledge of Antibiotic Use, Resistance, and Stewardship Programs among Pharmacy Technicians Serving in Ambulatory Care Settings in Pakistan and the Implications
Source: MDPI journal article supplement (doi:10.3390/antibiotics11070921), 2022-07-08
Supplement: s1 [file s1]

## Supplementary Material - Questionnaire

### **Section S1** Demographic details:

(Please select one option from the options given in front of each question)

- ✓ **Age (in years):** \_\_\_\_\_
- ✓ **Name of health facility:** \_\_\_\_\_
- ✓ **Gender:** A) Female B) Male
- ✓ **Marital Status:** A) Non-Married B) Married
- ✓ **Residence:** A) Rural B) Urban
- ✓ **Designation:** A) Junior pharmacy technician  
B) Senior pharmacy technician
- ✓ **Training/refresher course about medicines/antibiotics:** A) Yes B) No
- ✓ **Working Department:** A) Emergency pharmacy  
B) Indoor pharmacy  
C) Out door pharmacy
- ✓ **Years of Experiences:** A) 1-5 years B) 6-10 years C) 11-15 years  
D) 16-20 years E) More than 20 years
- ✓ **Number of prescriptions filled per day**  
A) 1-30 B) 31-60 C) 61-100 D) 101-150  
E) More than 151

### **Section S2:** Understanding about antibiotic use

(Please select one option according to your understanding about antibiotic use).

| Sr. No. | Variables                                                                                                  | Yes | No | Don't know |
|---------|------------------------------------------------------------------------------------------------------------|-----|----|------------|
| 1       | Antibiotics are the most commonly prescribed anti-infective agents by public health-care sector facilities |     |    |            |
| 2       | Common cold if treated with antibiotics will make the patients recover more quickly                        |     |    |            |
| 3       | Antibiotics should be prescribed as preventive measures to fight against future microbial attacks          |     |    |            |
| 4       | Antibiotics cannot treat influenza                                                                         |     |    |            |
| 5       | Antibiotics are indicated to relieve pain                                                                  |     |    |            |
| 6       | Antibiotics might develop allergy in susceptible individuals                                               |     |    |            |
| 7       | Diphenhydramine is an antibiotic used in treating upper respiratory infections                             |     |    |            |
| 8       | Cefotaxime belongs to the third-generation cephalosporins                                                  |     |    |            |
| 9       | Patients can stop taking antibiotics when the symptoms are improving                                       |     |    |            |

|           |                                                                                                                      |  |  |  |
|-----------|----------------------------------------------------------------------------------------------------------------------|--|--|--|
| <b>10</b> | Keeping the left-over antibiotic course for the next time treatment of the same type of infection is a good practice |  |  |  |
| <b>11</b> | Antibiotics treatment can eliminate most of the sensitive bacterial cells from patients                              |  |  |  |
| <b>12</b> | Antibiotics can be obtained without a prescription in Pakistan                                                       |  |  |  |
| <b>13</b> | Antibiotics are the first line of treatment in sore throat                                                           |  |  |  |

### **Section S3 : Understanding about antibiotic resistance**

(Please select one option according to your understanding about antibiotic resistance)

| <b>Sr. No.</b> | <b>Variables</b>                                                                                                                                                                    | <b>Yes</b> | <b>No</b> | <b>Don't know</b> |
|----------------|-------------------------------------------------------------------------------------------------------------------------------------------------------------------------------------|------------|-----------|-------------------|
| <b>1</b>       | A resistant bacterium cannot spread in healthcare institutions                                                                                                                      |            |           |                   |
| <b>2</b>       | Health care workers serve as vectors carrying resistant strains from infected patients to normal patients                                                                           |            |           |                   |
| <b>3</b>       | Exposure to antibiotics appears to be the principal risk factor for the emergence of antibiotic resistant bacteria                                                                  |            |           |                   |
| <b>4</b>       | Inadequate duration of therapy contributes to antibiotic resistance leading to poor patient compliance                                                                              |            |           |                   |
| <b>5</b>       | Inadequate doses contribute to antibiotic resistance due to poorly designed dosing regimen                                                                                          |            |           |                   |
| <b>6</b>       | Antimicrobial resistance can be minimized through changing empiric therapy to a selected narrow-spectrum therapy in response to the availability of culture and sensitivity results |            |           |                   |
| <b>7</b>       | Cross-resistance is the condition in which resistance occurs to a particular antibiotic that often results in resistance to other antibiotics, usually from a similar class         |            |           |                   |
| <b>8</b>       | Lack of enforcement regulation sometimes permits antibiotics to be purchased without a prescription from pharmacies                                                                 |            |           |                   |

**Section S4 Awareness about the terminologies related to antibiotic resistance**

(Please select one option according to your awareness about terminologies related to antibiotic resistance)

| Sr. No. | Variables                                                                              | Yes | No |
|---------|----------------------------------------------------------------------------------------|-----|----|
| 1       | Did you hear about the term: 'Antimicrobial resistance'?                               |     |    |
| 2       | Did you hear about the term: 'Antibiotic Resistance'?                                  |     |    |
| 3       | Did you hear about the term: 'Superbugs'?                                              |     |    |
| 4       | Did you hear about the term: 'Drug Resistance'?                                        |     |    |
| 5       | Did you hear about the term: 'Multidrug Resistance'?                                   |     |    |
| 6       | Did you hear about the term: 'Extensively drug Resistance'?                            |     |    |
| 7       | Did you hear about the: use of antibiotics with caution?                               |     |    |
| 8       | Did you hear about the: Antibiotic resistance spreading very fast?                     |     |    |
| 9       | Did you hear about the: national action plan for antimicrobial resistance in Pakistan? |     |    |

**Section S5 Awareness about the antimicrobial stewardship program (ASP)**

(Please select one option according to your understanding about antimicrobial stewardship program (ASP))

| Sr. No. | Variables                                                                                         | Yes | No | Don't know |
|---------|---------------------------------------------------------------------------------------------------|-----|----|------------|
| 1       | Did you hear about the term Antimicrobial Stewardship Programs (ASPs)?                            |     |    |            |
| 2       | Did you know the core components of Antimicrobial Stewardship Programs (ASPs)?                    |     |    |            |
| 3       | Did you know antimicrobial stewardship programs promote reasonable prescription of antimicrobials |     |    |            |
| 4       | Antimicrobial stewardship programs help control antimicrobial resistance                          |     |    |            |
| 5       | Antimicrobial stewardship programs reduce the overuse of antimicrobials                           |     |    |            |
| 6       | Antimicrobial stewardship programs reduce the cost of treatment.                                  |     |    |            |
| 7       | Antimicrobial stewardship programs Improves medical quality.                                      |     |    |            |

- What is the most common source of information about antibiotic use, antibiotic resistance, terminologies related to antibiotic resistance and antimicrobial stewardship program?
- A. Books & journals
  - B. Print & electronic media
  - C. Social media like Facebook, WhatsApp etc.
  - D. Health care professionals
  - E. Leaflets/ brochures
  - F. Online applications related to medicines
  - G. Others.
